# Supplementary material for: A bidirectional relationship between depression and the autoimmune disorders – New perspectives from the National Child Development Study
Source: PubMed Central journal article supplement (PMC5338810; doi:10.1371/journal.pone.0173015), 2017-03-06
Supplement: pone.0173015.s002.pdf [file pone.0173015.s002.pdf]

## Supplementary 2: Prevalence of Autoimmune Disorders

Below we have summarised the numbers of reported Autoimmune Disorders investigated in our sample, with data censored at age 46.

| <b>Autoimmune Disorder</b>          | <b>Number of Cases</b> | <b>ICD-10 Code</b> |
|-------------------------------------|------------------------|--------------------|
| Polyarthritis                       | 163                    | M13                |
| Rheumatoid Arthritis (Seronegative) | 37                     | M06                |
| Crohn's Disease                     | 26                     | K50                |
| Multiple Sclerosis                  | 25                     | G35                |
| Psoriasis                           | 24                     | L40                |
| Ulcerative Colitis                  | 12                     | K51                |
| Celiac Disease                      | 11                     | K90                |
| Type 1 Diabetes                     | 5                      | E10                |
| Sjogren Syndrome                    | 4                      | M35                |
| Pernicious Anemia                   | 3                      | D51                |
| Graves' Disease                     | 2                      | E05                |
| Pulmonary Fibrosis                  | 2                      | J84                |
| Hashimoto's                         | 1                      | E06                |
| Scleroderma                         | 1                      | L94                |
| Addison's Disease                   | 0                      | E27                |
| Dermatomyositis                     | 0                      | M33                |
| Granulomatosis                      | 0                      | M31                |
| Haemolytic Anaemia                  | 0                      | D59                |
| Lupus                               | 0                      | M32                |
| Myasthenia Gravis                   | 0                      | G70                |
| Myocarditis                         | 0                      | I40                |
| Rheumatoid Arthritis (Seropositive) | 0                      | M05                |
| Thrombocytopenia Purpura            | 0                      | D69                |
| Vitiligo                            | 0                      | L80                |

**Table S2:** Number of cases for each autoimmune disorder investigated, with ICD-10 code used for classification
